# Supplementary material for: Thy-1 Regulates VEGF-Mediated Choroidal Endothelial Cell Activation and Migration: Implications in Neovascular Age-Related Macular Degeneration
Source: PubMed Central journal article supplement — Invest Ophthalmol Vis Sci. 2016 Oct;57(13):5525–34. doi: 10.1167/iovs.16-19691 (PMC5080948; doi:10.1167/iovs.16-19691), 2016-10
Supplement: iovs-57-11-70_s01.pdf [file iovs-57-11-70_s01.pdf]

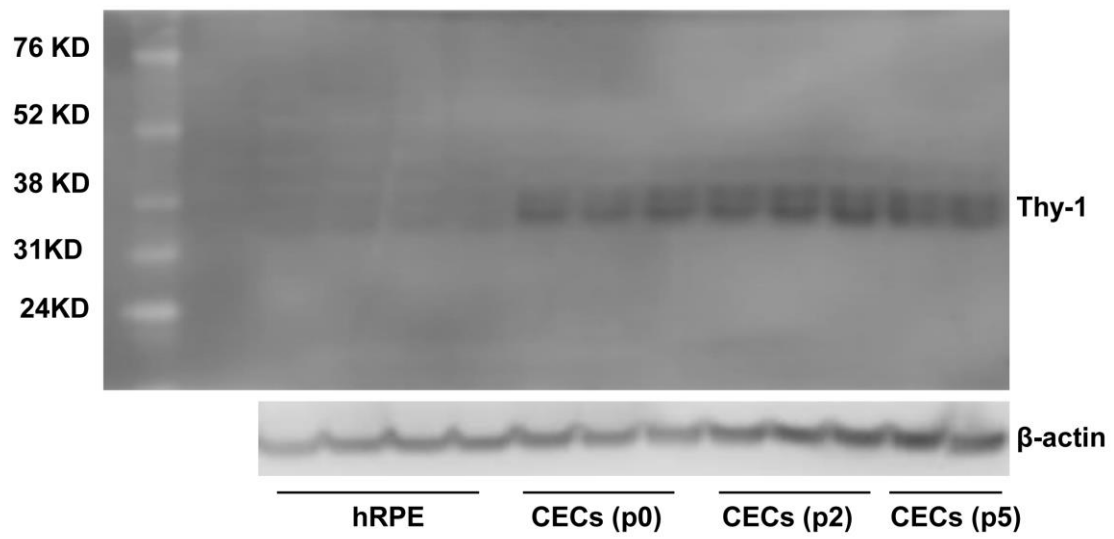

**Supplemental Figure 1.** Western blots of Thy-1 protein in human RPE and choroidal endothelial cells (CECs) without passaging (p0) and that in CECs at p2 and p5.
